# Supplementary material for: Enhanced oxidation of sulfite over a highly efficient biochar-induced silica composite for sulfur resource utilization in magnesia desulfurization
Source: Royal Society of Chemistry journal article supplement (doi:10.1039/d0ta10354c), 2021-01-01
Supplement: d0ta10354c1.pdf [file d0ta10354c1.pdf]

## Electronic Supplementary Information

### Enhanced Oxidation of Sulfite over a Highly Efficient Biochar-induced Silica

### Composite for Sulfur Resource Utilization in Magnesia Desulfurization

Tieyue Qi <sup>a,b</sup>, Lei Xing <sup>a,b</sup>, Zhimo Fang <sup>a,b</sup>, Lin Zhang <sup>a,b</sup>, Huining Xiao <sup>c</sup>, Lidong

Wang <sup>a,b,\*</sup>

*a Hebei Key Laboratory of Power Plant Flue Gas Multi-Pollutants Control,  
Department of Environmental Science and Engineering, North China Electric Power  
University, Baoding, 071003, China*

*b MOE Key Laboratory of Resources and Environmental Systems Optimization,  
College of Environmental Science and Engineering, North China Electric Power  
University, Beijing, 102206, China*

*c Department of Chemical Engineering, University of New Brunswick, Fredericton,  
Canada*

---

\*Corresponding author. Tel.: +86 312 7525511.

E-mail: wld@tsinghua.edu.cn (L.D.W.)

## 1 Chemicals

2 The chemicals used in this work were as follows: hexadecyl trimethyl ammonium  
3 bromide (Alfa Aesar Co., Ltd.; purity  $\geq 98\%$ ), tetraethoxysilane (Alfa Aesar Co., Ltd.;  
4 purity  $\geq 98\%$ ), sodium hydroxide (Tianjin Bei Chen Fang Zheng Reagent Factory;  
5 purity  $\geq 96.0\%$ ), cobalt nitrate hexahydrate (Alfa Aesar Co., Ltd.; purity  $\geq 97.7\%$ ),  
6 nitric acid, magnesium chloride hexahydrate (Tianjin Fuchen Chemical Reagent, AR,  
7 purity  $\geq 98.0\%$ ), sodium sulfite (Tianjin Guangfu Technology, AR, purity  $\geq 97.0\%$ ),  
8 barium chloride (Tianjin Bei Chen Fang Zheng Reagent, AR, purity  $\geq 99.5\%$ ), sodium  
9 chloride (Tianjin Bei Chen Fang Zheng Reagent, AR, purity  $\geq 99.5\%$ ), hydrochloric  
10 acid (Tianjin Beilian Chemical, AR, purity  $\geq 36.0\%$ ), glycerol (Tianjin Bei Chen Fang  
11 Zheng Reagent, AR, purity  $\geq 99.0\%$ ), and glacial acetic acid (Tianjin Fuchen  
12 Chemical Reagent, AR, purity  $\geq 99.5\%$ ). Biochar in particle size 300~450 $\mu\text{m}$  was  
13 prepared by microwave synthesis method with maple wood as raw material.

14

15

1 The surface energy of CoO and Co<sub>2</sub>O<sub>3</sub> for different facets surface are computed by the  
2 following equation <sup>1,2</sup>. And (111) and (001) facets surface are the thermodynamically  
3 preferred morphology for CoO and Co<sub>2</sub>O<sub>3</sub>, respectively, thus being chosen for DFT  
4 calculation in this work to compare the catalytic performance of Co(II) and Co(III) in  
5 sulfite oxidation.

$$6 \quad E_{surface} = \frac{E_{slab} - nE_{bulk}}{2A} \quad \text{Eq.S1}$$

7 Where  $E_{slab}$  is the total energy of the slab,  $E_{bulk}$  is the total energy of the bulk per unit  
8 cell,  $n$  is the number of bulk unit cells contained in the slab, and  $A$  is the surface area  
9 of each side of the slab, the 1/2 factor is used to obtain the average value of the  
10 surface energies of the top and bottom of the slab.

11

## 1 Free energy from DFT calculations

2 The relative free energies ( $\Delta G$ ) were calculated as below.

3 
$$\Delta G = \Delta E + \Delta E_{ZPE} - T\Delta S$$
 Eq.S2

4 Where  $\Delta E$  is the energy difference obtained by DFT calculations.  $\Delta E_{ZPE}$  and  $\Delta S$  are the  
5 differences in zero-point energy (ZPE) and entropy(S), respectively, which are  
6 obtained by the vibrational frequency calculation<sup>3,4</sup>.

7

8

9

1

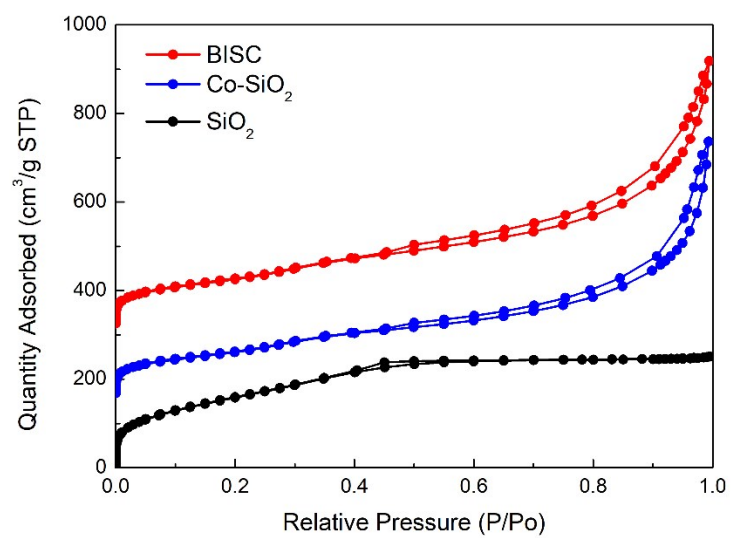

2

3

**Figure S1** N<sub>2</sub> adsorption-desorption isotherms of SiO<sub>2</sub>, Co-SiO<sub>2</sub> and BISC

4

5

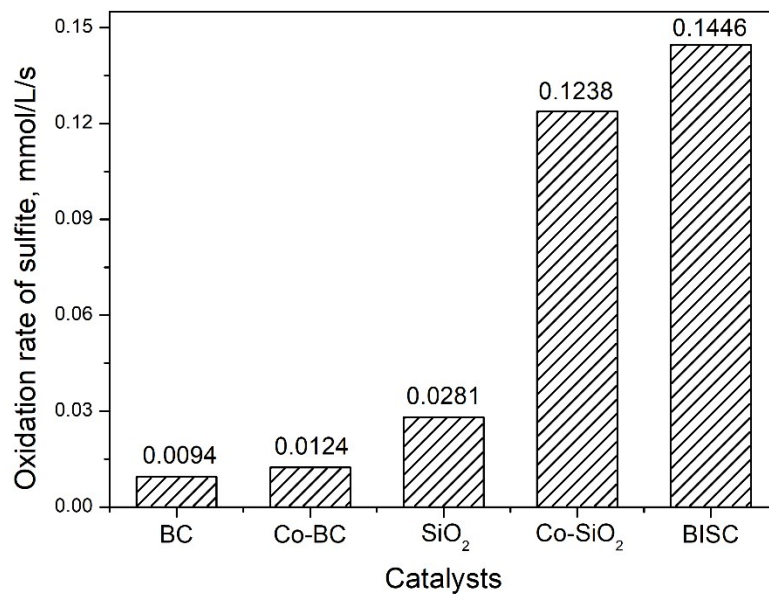

1

2 **Figure S2** Comparison of the catalytic performance of catalysts in sulfite oxidation

3

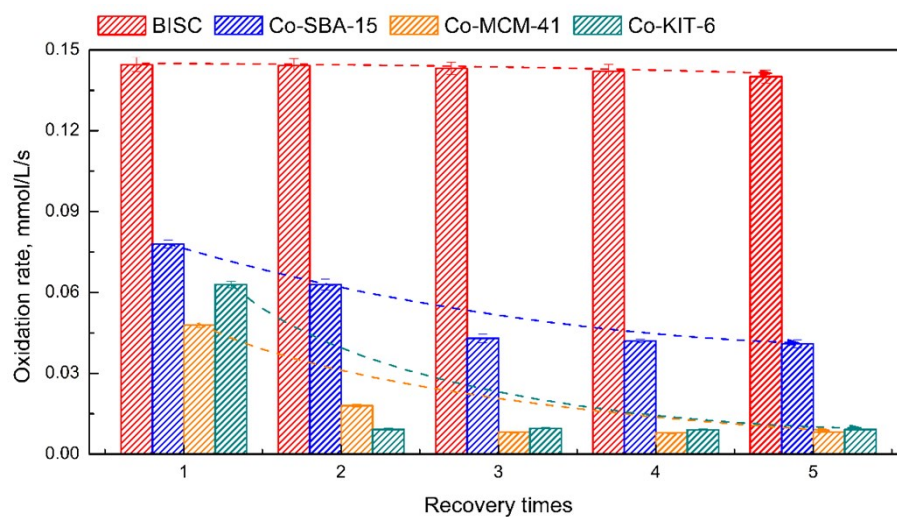

1

2 **Figure S3** Recovery performance comparison of BISC, Co-SBA-15, Co-MCM-41, and Co-KIT-6

3

4

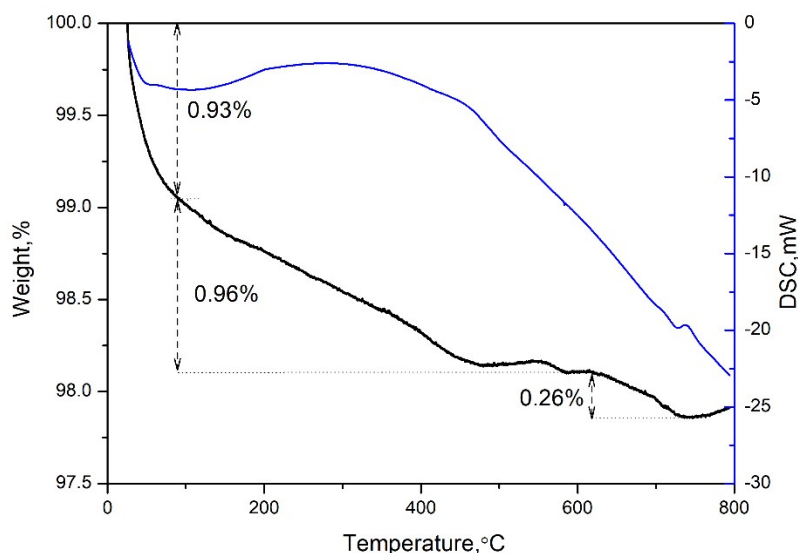

**Figure S4** TGA curve of BISC

TGA was performed to obtain the thermal behavior of BISC, as exhibited in Figure S4. The weight loss of 0.93% can be attributed to the elimination of water physically adsorbed on the mesoporous material. A further mass loss of 0.96% is related to decomposition of the residual CTAB organic matter present in the pores of BISC<sup>5,6</sup>. The third mass loss of 0.26% is ascribed to the small coke residuals, which can modify surface properties of the siliceous materials and thus influence on catalytic properties<sup>7</sup>. As the carbon amount of BISC is originated from residual CTAB template and coke residuals, it is determined to be approximately 1.45% via elemental analysis in Table S2, in agreement with TGA.



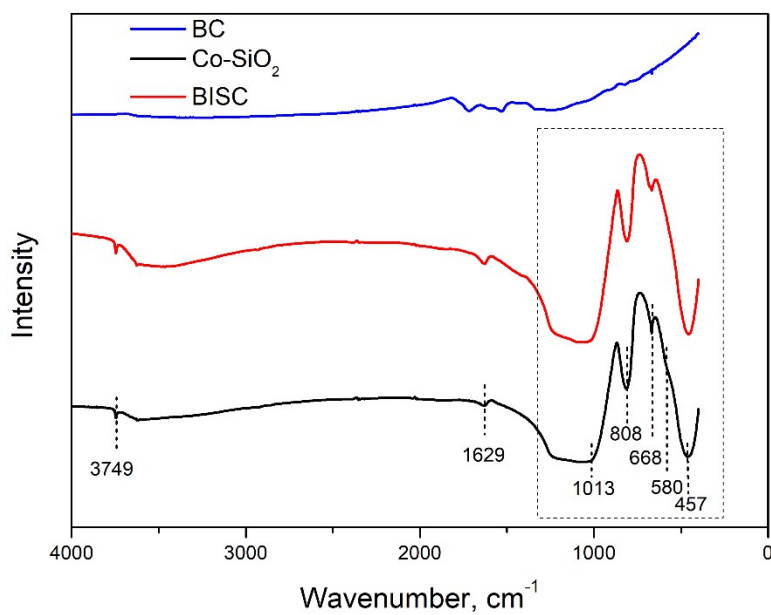

**Figure S5** FT-IR spectra of biochar,  $\text{Co-SiO}_2$ , and BISC

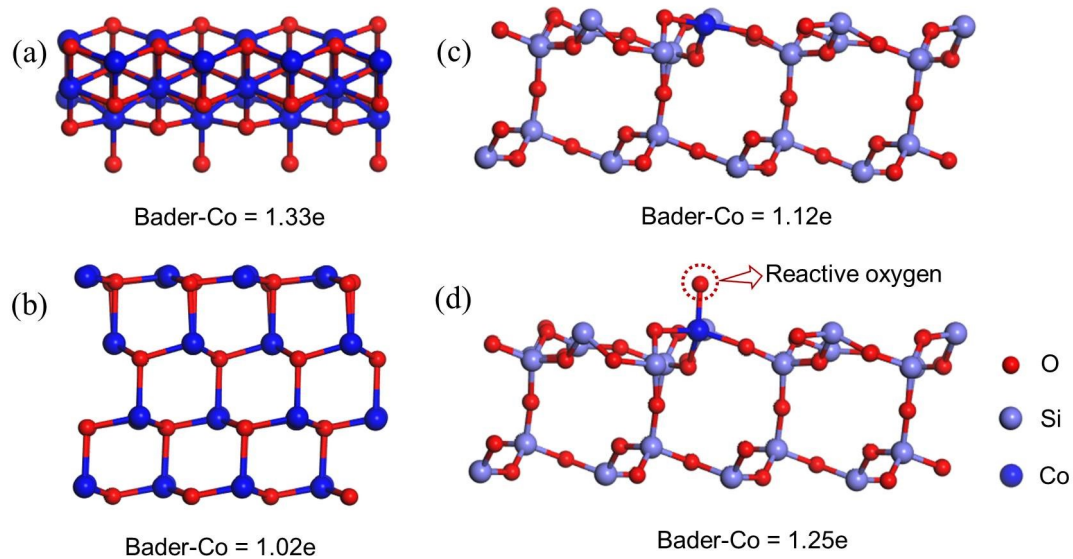

1

2 **Figure S6** Optimized geometries and Bader charge of Co. (a) Co(III), (b) Co(II), (c) Co-SiO<sub>2</sub>, and

3 (d) BISC

4

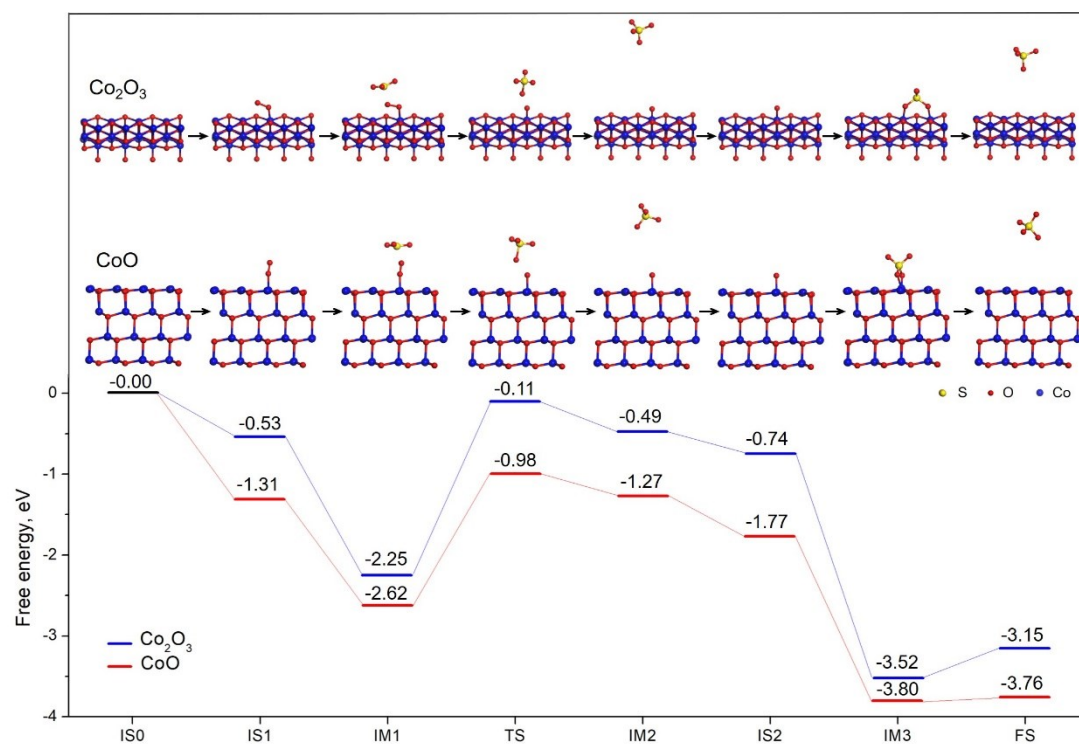

**Figure S7** Reaction pathway of sulfite oxidation on Co(III) and Co( II ) surface

1

**Table S1** Cobalt dispersion of prepared catalysts

| Samples          | BISC<br>(Co/Si=1/20) | BISC<br>(Co/Si=1/10) | BISC<br>(Co/Si=2/10) | BISC<br>(Co/Si=4/10) |
|------------------|----------------------|----------------------|----------------------|----------------------|
| Co dispersion, % | 0.429                | 0.283                | 0.2995               | 0.3148               |

2

3

1

**Table S2** Physical properties of SiO<sub>2</sub>, Co-SiO<sub>2</sub> and BISC

| Sample              | BET surface area, m <sup>2</sup> /g | Average pore diameter, nm |
|---------------------|-------------------------------------|---------------------------|
| SiO <sub>2</sub>    | 525.1                               | 2.7                       |
| Co-SiO <sub>2</sub> | 340.9                               | 10.3                      |
| BISC                | 387.4                               | 9.5                       |

2

3

1

2

**Table S3** Chemical composition of samples

| Sample        | C, wt% | N, wt% | H, wt% | O, wt% | Si, wt% | Co, wt% (ICP) |
|---------------|--------|--------|--------|--------|---------|---------------|
| Maple residue | 47.94  | 0.16   | 6.94   | 44.17  | –       | –             |
| Biochar       | 84.20  | 0.26   | 3.06   | 11.71  | –       | –             |
| BISC          | 1.45   | 0.68   | 1.70   | 43.20  | 39.65   | 13.32         |

**Table S4** Cobalt content in various catalysts by ICP-OES and the corresponding catalytic

2 performance in sulfite oxidation

| Number | Sample                                | Co content, wt% | Catalytic activity, S(IV) mmol /L/s | Reference |
|--------|---------------------------------------|-----------------|-------------------------------------|-----------|
| 1      | BISC (Co/Si=1/20)                     | 4.41            | 0.1024                              | This work |
| 2      | BISC (Co/Si=1/10)                     | 7.85            | 0.119                               | This work |
| 3      | BISC (Co/Si=2/10)                     | 13.32           | 0.1446                              | This work |
| 4      | BISC (Co/Si=4/10)                     | 16.61           | 0.1444                              | This work |
| 5      | Co-SiO <sub>2</sub> (Co/Si=2/10)      | 14.73           | 0.1238                              | This work |
| 6      | Mn@ZIF67                              | 18.07           | 0.094                               | [9]       |
| 7      | Co-SBA-15                             | 2.1             | 0.078                               | [19]      |
| 8      | Co(OH) <sub>2</sub> /TiO <sub>2</sub> | 6               | 0.113                               | [22]      |
| 9      | Co-CNTs                               | 30              | 0.0694                              | [33]      |
| 10     | Co-TiO <sub>2</sub>                   | 4               | 0.0398                              | [35]      |

---

3

**Table S5** Chemical reaction parameters with different intermediates

| Intermediates                                                                     | $\Delta E$ , eV | Zero-point energy, eV | Entropy, eV/K | T, K   | $\Delta G$ , eV |
|-----------------------------------------------------------------------------------|-----------------|-----------------------|---------------|--------|-----------------|
| CoO-O <sub>2</sub> IS1                                                            | -1.32           | 0.48                  | 0.001467      | 318.15 | -1.31           |
| CoO-O <sub>2</sub> -SO <sub>3</sub> <sup>2-</sup> IM1                             | -2.80           | 0.65                  | 0.001468      | 318.15 | -2.62           |
| CoO-O <sub>2</sub> -SO <sub>3</sub> <sup>2-</sup> TS                              | -1.10           | 0.65                  | 0.001658      | 318.15 | -0.98           |
| CoO-O <sub>2</sub> -SO <sub>3</sub> <sup>2-</sup> IM2                             | -1.35           | 0.57                  | 0.001532      | 318.15 | -1.27           |
| CoO-O IS2                                                                         | -1.77           | 0.37                  | 0.001159      | 318.15 | -1.77           |
| CoO-O-SO <sub>3</sub> <sup>2-</sup> IM3                                           | -4.00           | 0.60                  | 0.001267      | 318.15 | -3.80           |
| CoO-O-SO <sub>3</sub> <sup>2-</sup> FS                                            | -3.84           | 0.47                  | 0.001211      | 318.15 | -3.76           |
| Co <sub>2</sub> O <sub>3</sub> -O <sub>2</sub> IS1                                | -0.59           | 0.47                  | 0.001286      | 318.15 | -0.53           |
| Co <sub>2</sub> O <sub>3</sub> -O <sub>2</sub> -SO <sub>3</sub> <sup>2-</sup> IM1 | -2.51           | 0.73                  | 0.001460      | 318.15 | -2.25           |
| Co <sub>2</sub> O <sub>3</sub> -O <sub>2</sub> -SO <sub>3</sub> <sup>2-</sup> TS  | -0.20           | 0.47                  | 0.001188      | 318.15 | -0.11           |
| Co <sub>2</sub> O <sub>3</sub> -O <sub>2</sub> -SO <sub>3</sub> <sup>2-</sup> IM2 | -0.63           | 0.53                  | 0.001228      | 318.15 | -0.49           |
| Co <sub>2</sub> O <sub>3</sub> -O IS2                                             | -0.80           | 0.36                  | 0.000911      | 318.15 | -0.74           |
| Co <sub>2</sub> O <sub>3</sub> -O-SO <sub>3</sub> <sup>2-</sup> IM3               | -3.73           | 0.63                  | 0.001310      | 318.15 | -3.52           |
| Co <sub>2</sub> O <sub>3</sub> -O-SO <sub>3</sub> <sup>2-</sup> FS                | -3.18           | 0.61                  | 0.001817      | 318.15 | -3.15           |
| Co-SiO <sub>2</sub> -O <sub>2</sub> IS1                                           | -0.62           | 0.70                  | 0.001362      | 318.15 | -0.36           |
| Co-SiO <sub>2</sub> -O <sub>2</sub> -SO <sub>3</sub> <sup>2-</sup> IM1            | -1.80           | 0.79                  | 0.001891      | 318.15 | -1.61           |
| Co-SiO <sub>2</sub> -O <sub>2</sub> -SO <sub>3</sub> <sup>2-</sup> TS             | 0.34            | 0.54                  | 0.001244      | 318.15 | 0.48            |
| Co-SiO <sub>2</sub> -O <sub>2</sub> -SO <sub>3</sub> <sup>2-</sup> IM2            | -0.16           | 0.69                  | 0.001918      | 318.15 | -0.09           |
| Co-SiO <sub>2</sub> -O IS2                                                        | -1.22           | 0.44                  | 0.001303      | 318.15 | -1.20           |
| Co-SiO <sub>2</sub> -O-SO <sub>3</sub> <sup>2-</sup> IM3                          | -1.89           | 0.22                  | 0.000223      | 318.15 | -1.75           |
| Co-SiO <sub>2</sub> -O-SO <sub>3</sub> <sup>2-</sup> FS                           | -1.03           | 0.46                  | 0.001256      | 318.15 | -0.97           |



1

**Table S6** Adsorption  $\Delta G$  and Desorption  $\Delta G$  in the whole reaction

| Sample              | Reaction range | SO <sub>3</sub> <sup>2-</sup> Adsorption $\Delta G$ , eV | SO <sub>4</sub> <sup>2-</sup> Desorption $\Delta G$ , eV |
|---------------------|----------------|----------------------------------------------------------|----------------------------------------------------------|
| Co-SiO <sub>2</sub> | IS1→IM2        | -1.25                                                    | 1.52                                                     |
|                     | IS2→FS         | -0.55                                                    | 0.78                                                     |
| BISC                | IS2→FS         | -0.55                                                    | 0.78                                                     |

2

3

## 1 References

- 2 1. K. Park, A. M. Kolpak, *J. Mater. Chem. A*, 2019, **7**, 6708-6719.
- 3 2. W. Shi, F. Guo, H. Wang, M. Han, H. Li, S. Yuan, H. Huang, Y. Liu, and Z. Kang,  
4 *Appl. Catal. B-Environ.* 2017, **219**, 36–44.
- 5 3. J. Long, X. Fu, and J. Xiao, *J. Mater. Chem. A*, **8**, 17078-17088.
- 6 4. V. Wang, N. Xu, J.C. Liu, G. Tang, et al, VASPKIT: A Pre- and Post-Processing  
7 Program for VASP code, *aeXiv*, 2019, **1908**, 08269.
- 8 5. J. Arnaldo Santana Costa, R. Anjos de Jesus, C. Marcio Paranhos da Silva and L.  
9 Pimenta Cruz Romão, *Powder Technol.* 2017, **308**, 434–441.
- 10 6. A. A. Costa, G. F. Ghesti, J. L. de Macedo, V. S. Braga, M. M. Santos, J. A. Dias  
11 and S. C.L. Dias, *J. Mol. Catal. A-Chem.* 2008, **282**, 149–157.
- 12 7. J. Ryczkowski, J. Goworek, W. Gac, S. Pasieczna and T. Borowiecki,  
13 *Thermochim. Acta.* 2005, **434**, 2–8.

14
